# Supplementary material for: Advanced Security Printing Enabled by Biomass-Derived Multicolor Anti-Counterfeiting Fluorescent Carbon Dot Ink with Multimodal Applications
Source: Research Square preprint supplement (doi:10.21203/rs.3.rs-6547577/v1), 2025-05-13
Supplement: Supplementary file 1 [file e3751d6efddab39456ed2787.docx]

**Preparation and Multimodal Applications of Biomass-Based Fluorescent Carbon Dots Ink with Multifunctional Anti-Counterfeiting Effects**

**Supplementary Information**

CaiTingTing1, ZhaoYiFan1, Zhang Tingyu1, Yang Yun2

1 Department of Chemistry and Material Engineering, Lyuliang University, Lyuliang 033000, P. R. China

2 Department of Resource and Mechanical Engineering, Lyuliang University, Lvliang, China


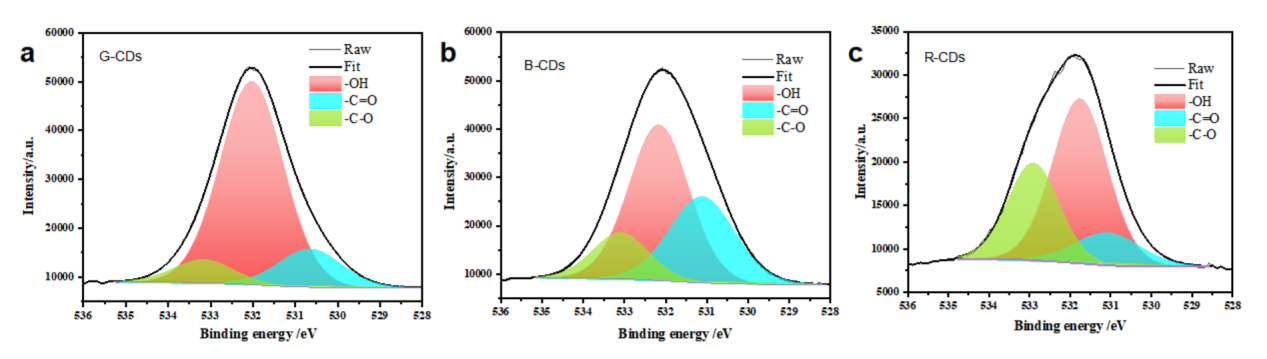


Figure S1 High-resolution O 1s spectrum of (b) B-CDs and (c) G-CDs.


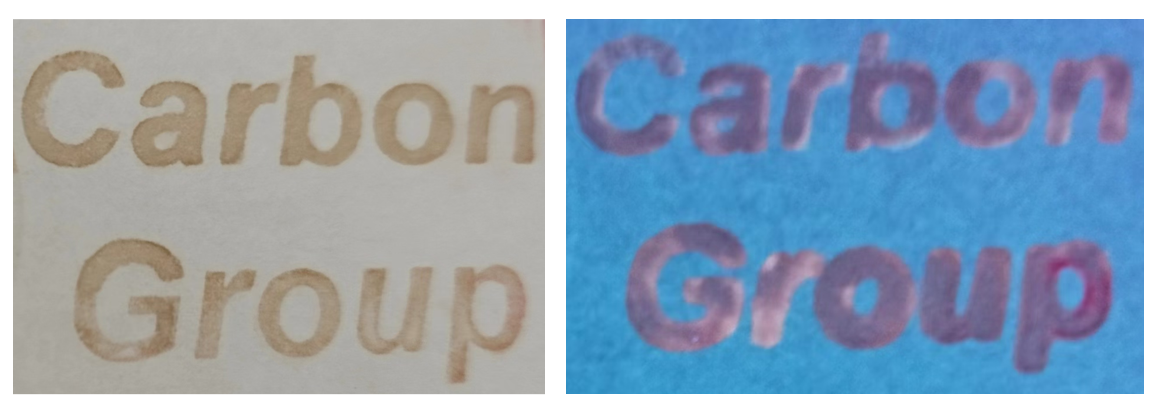


Figure S2 The sealing of the R-CDs solution without purification treatment under sunlight and 365 nm UV illumination.


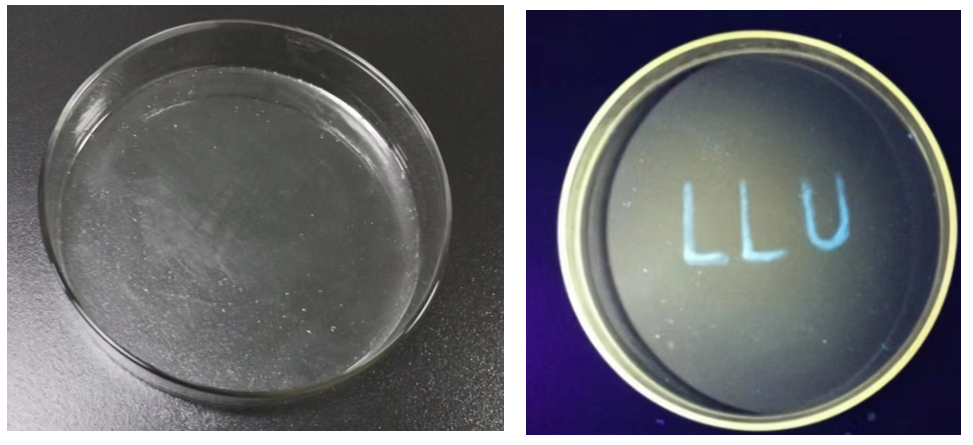


Figure S3 The writing of B-CDs ink pen on the PVA film under sunlight and 365 nm UV illumination.


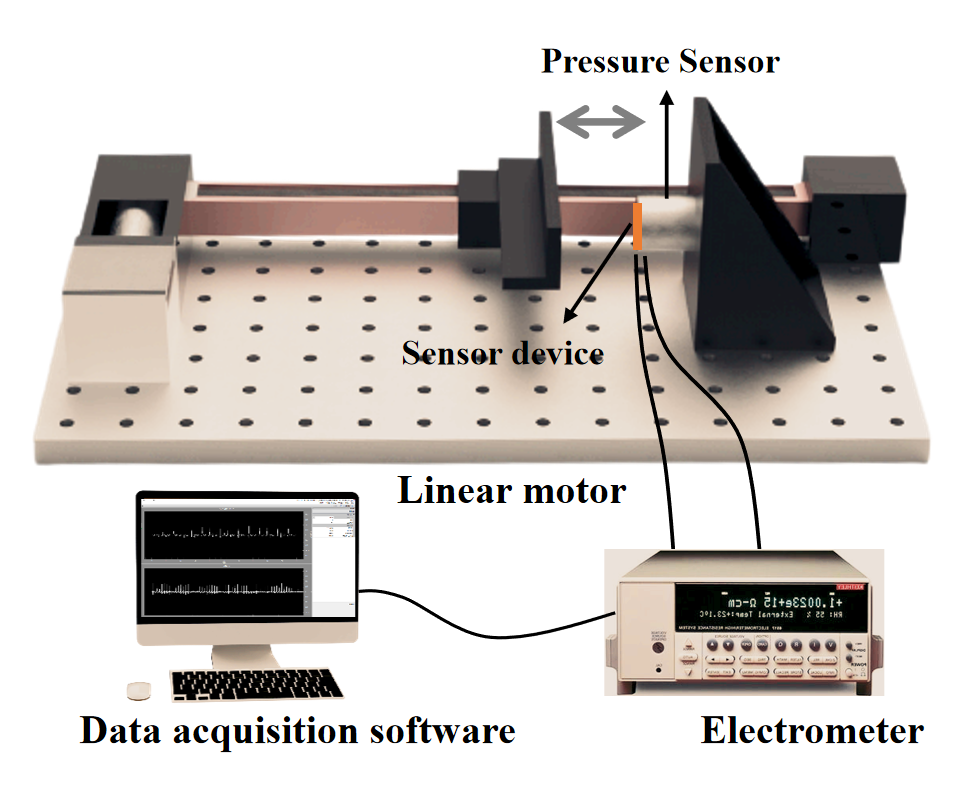


Figure S4 The schematic illustration of triboelectric sensor testing system
